# Supplementary material
Source: Springer Nature journal article supplement (https://www.springermedizin.de/resource/supplementary/12880_2011_123_MOESM4_ESM.pdf/9450042)

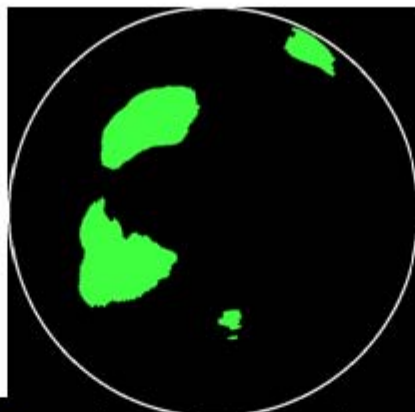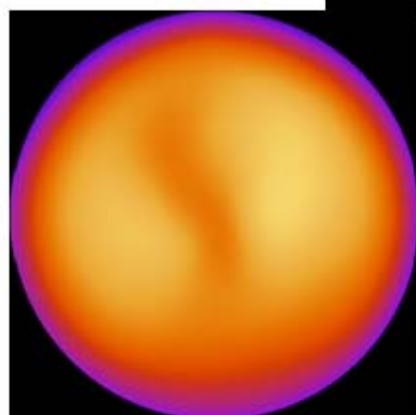

Normal weight

NC

AC

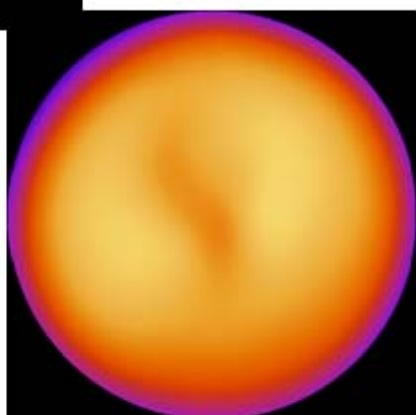

Obese

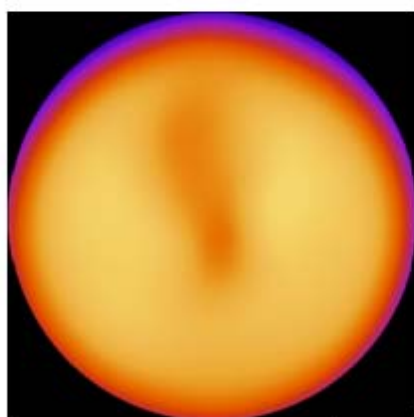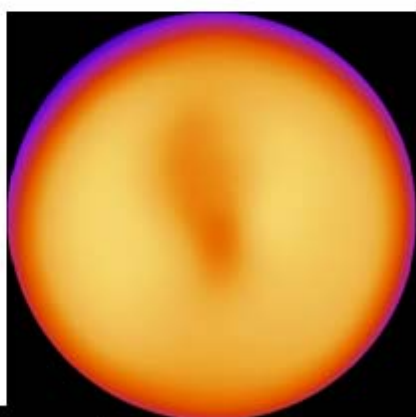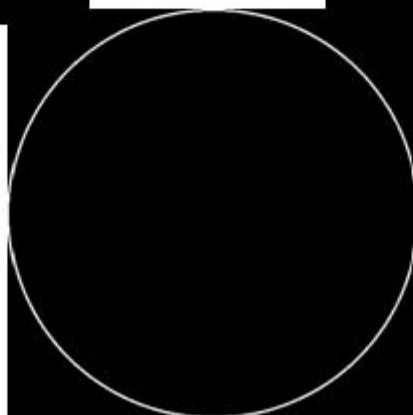

Supplement: MOESM4 [file 9450042]
